# Supplementary material
Source: JCI journal article supplement (doi:10.1172/jci191266)
Supplement: sd1 [file 1]

191266

**Conflict of interest:**

JAC received personal compensation for consulting for Astoria, Atara, Biogen, Bristol-Myers Squibb, Convelo, and Viatrix. ASP received equity, payments, and research funding from Cabaletta Bio and provided consulting to Janssen, Sanofi, and Avilar.

ASP reports patent royalties from US Patent PCT/US2015/028872, WO/2015/168613A3, US Patent 10,301,370 B2 (“Compositions and methods of chimeric autoantibody receptor T cells”) and US Patent PCT/US2019/035409, WO/2019/236593A1 (“Compositions and methods of muscle specific kinase chimeric autoantibody receptor T cells”), both licensed by Calaletta Bio.

AHJK reports US Patent 11029318B2 (“Methods for predicting and treating patients with increased risk of adverse pregnancy outcome”) with Kypha.

JAS has received research support from Boehringer Ingelheim, Bristol Myers Squibb, Johnson & Johnson, and Sonoma Biotherapeutics unrelated to this work. He has performed consultancy for AbbVie, Amgen, Boehringer Ingelheim, Bristol Myers Squibb, Fresenius Kabi, Gilead, Inova Diagnostics, Johnson & Johnson, Merck, MustangBio, Novartis, Optum, Pfizer, ReCor, Sana, Sobi, and UCB unrelated to this work.

YMD has served as a consultant and/or received grant support from Biogen Idec, Celgene/Bristol Myers Squibb, EMD Serono, Sanofi-Genzyme, Roche-Genentech, Novartis, Questor, Janssen, and Teva Neuroscience.

JAJ has received consulting funds from GSK and has IP with OMRF licensed to Progentec Biosciences. JAJ reports US Patent 20240011983 (“Method for determining whether a systemic lupus erythematosus (sle) patient is undergoing a pre-flare event”) with OMRF licensed to Progentec Biosciences.

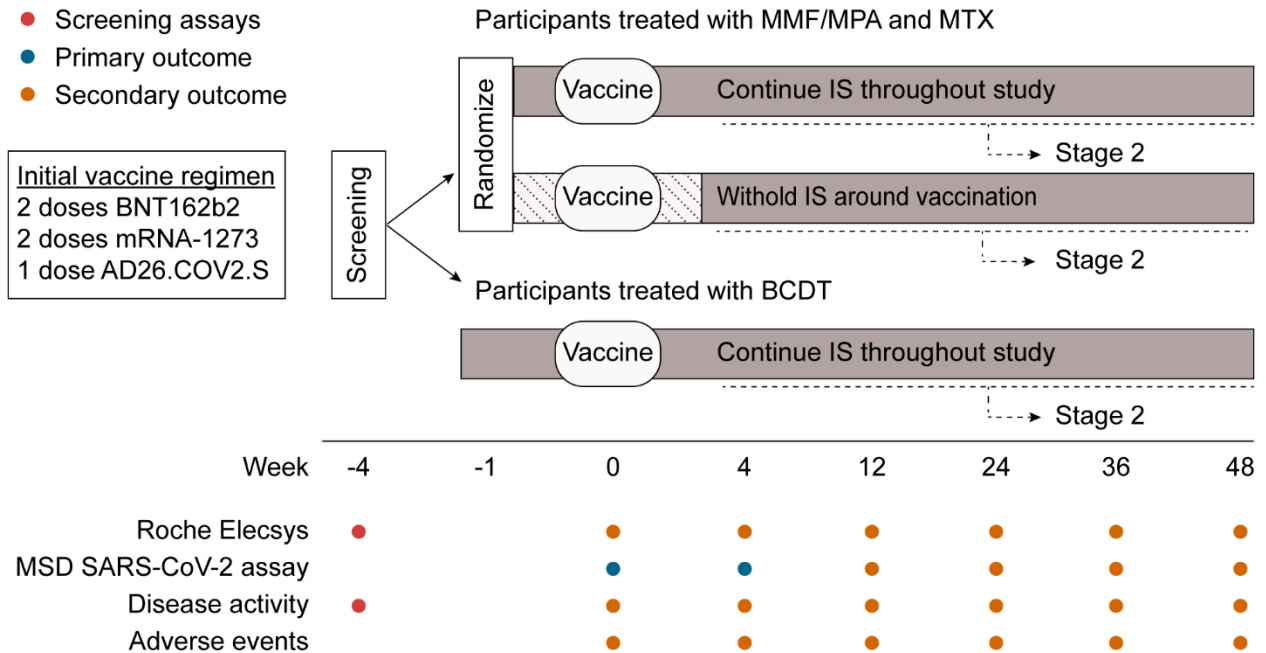

**Supplemental Figure 1. Schematic overview of the study design.** After screening (week -4), participants with autoimmune diseases treated with MMF/MPA, MTX, or BCDT who had completed an initial COVID-19 vaccine regimen (2 doses BNT162b2, 2 doses mRNA-1273, or 1 dose AD26.COVS.2) and met all eligibility criteria were enrolled. All participants received an additional COVID-19 vaccine dose at week 0. Participants on MMF/MPA or MTX were randomized to either continue or withhold immunosuppression (IS) around the time of additional vaccination; participants on BCDT continued IS throughout. Assessments included screening assays (Roche Elecsys assay; red dots), primary outcome (MSD SARS-CoV-2 assay; blue dots), and secondary outcomes (disease activity, adverse events; orange dots) at the indicated time points. Participants with suboptimal humoral responses after Stage 1 were eligible to proceed to Stage 2 (not reported here). Roche Elecsys and MSD SARS-CoV-2 assays, disease activity, and adverse events were evaluated as shown in the assessment schedule.

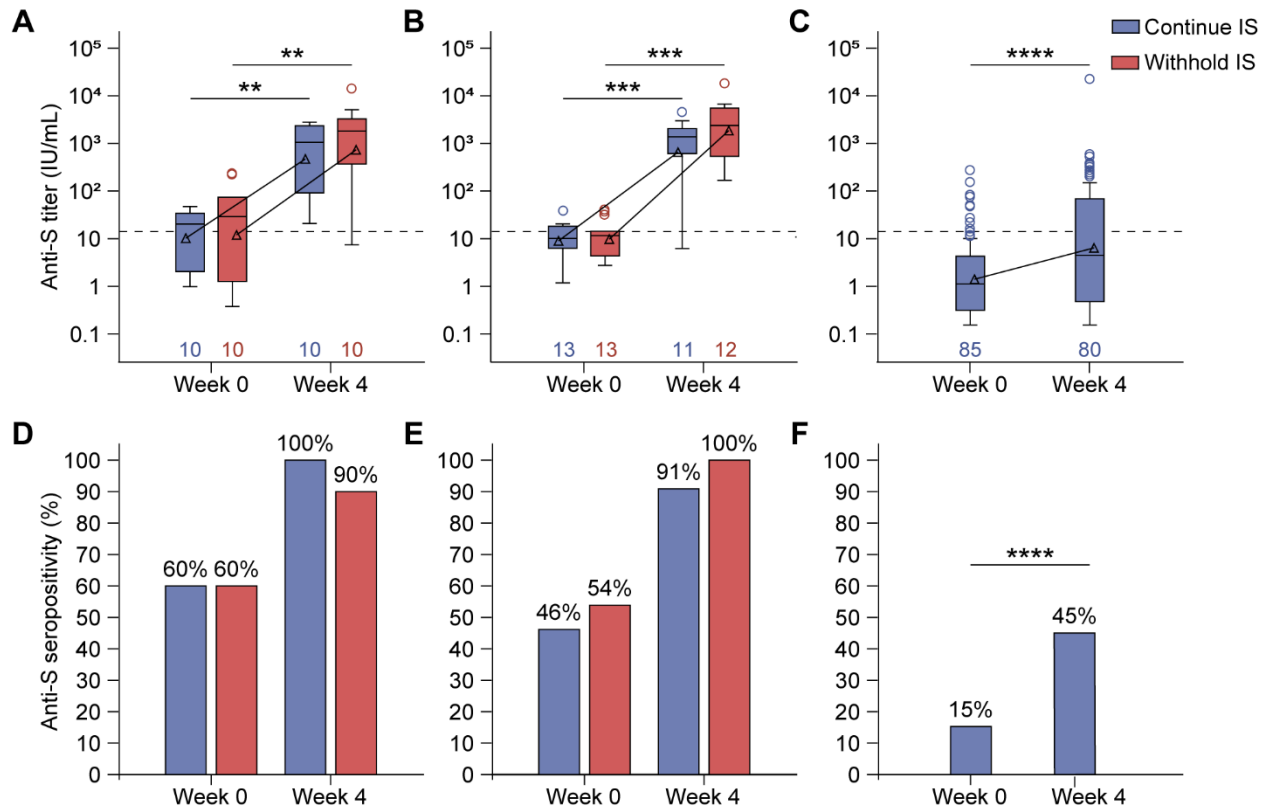

**Supplemental Figure 2. Anti-Spike (S) concentrations and seropositivity in participants treated with mycophenolate mofetil/mycophenolic acid (MMF/MPA)-, methotrexate (MTX)-, and B cell-depleting therapy (BCDT) who received a third mRNA vaccine.** Concentrations of anti-spike antibodies at baseline and 4 weeks post-third vaccination in participants in the (A) MMF/MPA-, (B) MTX-, or (C) BCDT cohorts. Box plots display the interquartile range (IQR), with the line within the box indicating median values. Geometric mean values are represented by triangles and connected across study visits. Whiskers extend to 1.5\*IQR, with circles indicating outliers. The dashed line represents the positivity cut-off, and numbers indicate the number of participants analyzed at each time point. The Wilcoxon signed-rank test was used to assess the change in antibody concentration from baseline to Week 4 within each group. No significant difference in concentrations in those who continued or withheld immunosuppressants using a van Elteren test. Seropositivity of anti-S antibodies at baseline and 4 weeks post-third vaccination in participants in the (D) MMF/MPA-, (E) MTX-, or (F) BCDT cohorts. Statistical significance was determined using a McNemar test. \*\* $p < 0.01$ ; \*\*\* $p < 0.001$ ; \*\*\*\* $p < 0.0001$ .

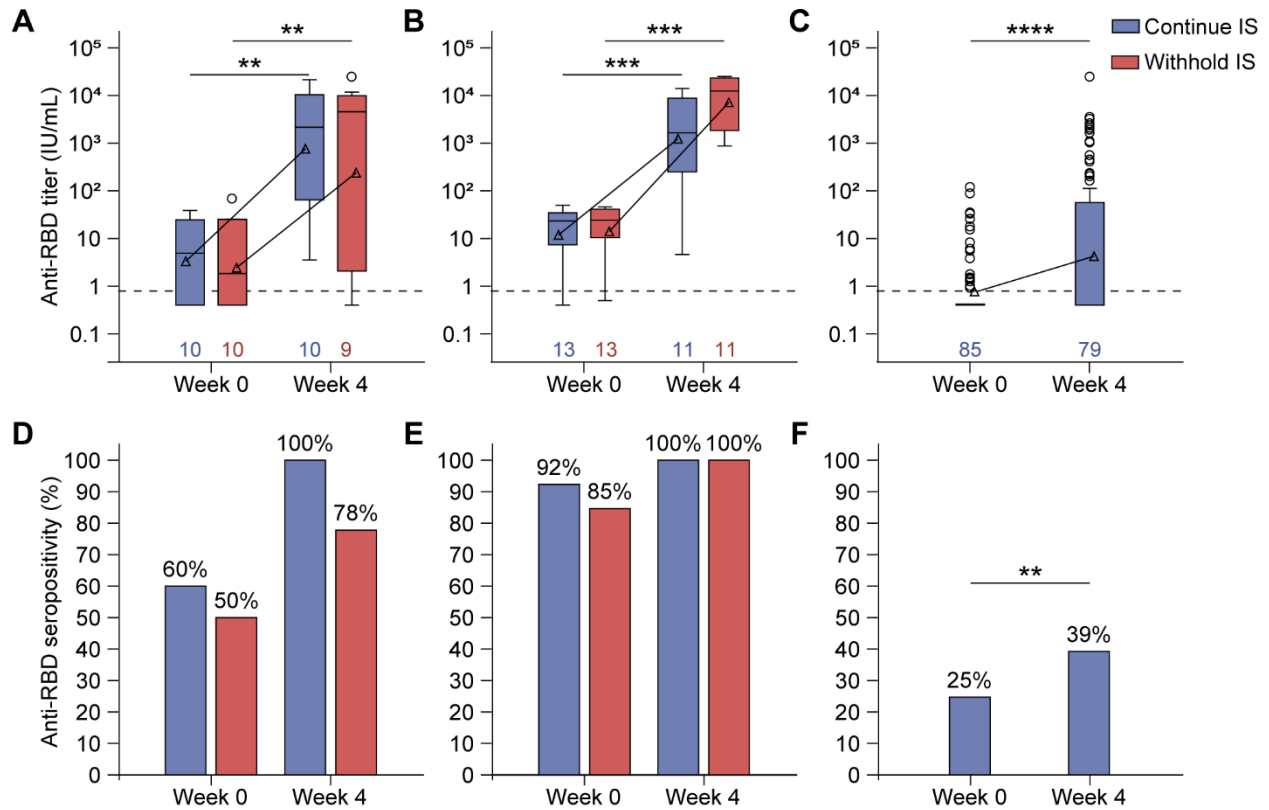

**Supplemental Figure 3. Roche Elecsys® anti-spike concentrations and seropositivity in participants treated with mycophenolate mofetil/mycophenolic acid (MMF/MPA)-, methotrexate (MTX)-, and B cell-depleting therapy (BCDT) who received a third mRNA vaccine.** Concentrations of anti-RBD antibodies at baseline and 4 weeks post-third vaccination in participants in the (A) MMF/MPA-, (B) MTX-, or (C) BCDT cohorts. Box plots display the interquartile range (IQR), with the line within the box indicating median values. Geometric mean values are represented by triangles and connected across study visits. Whiskers extend to 1.5\*IQR, with circles indicating outliers. The dashed line represents the positivity cut-off, and numbers indicate the number of participants analyzed at each time point. The Wilcoxon signed-rank test was used to assess the change in antibody concentration from baseline to Week 4 within each group. Seropositivity of Roche Elecsys® anti-RBD antibodies at baseline and 4 weeks post-third vaccination in participants in the (D) MMF/MPA-, (E) MTX-, or (F) BCDT cohorts. Statistical significance was determined using a McNemar test. No significant difference in concentrations in those who continued or withheld immunosuppressants using a van Elteren test. \*\* $p < 0.01$ ; \*\*\* $p < 0.001$ ; \*\*\*\* $p < 0.0001$ .

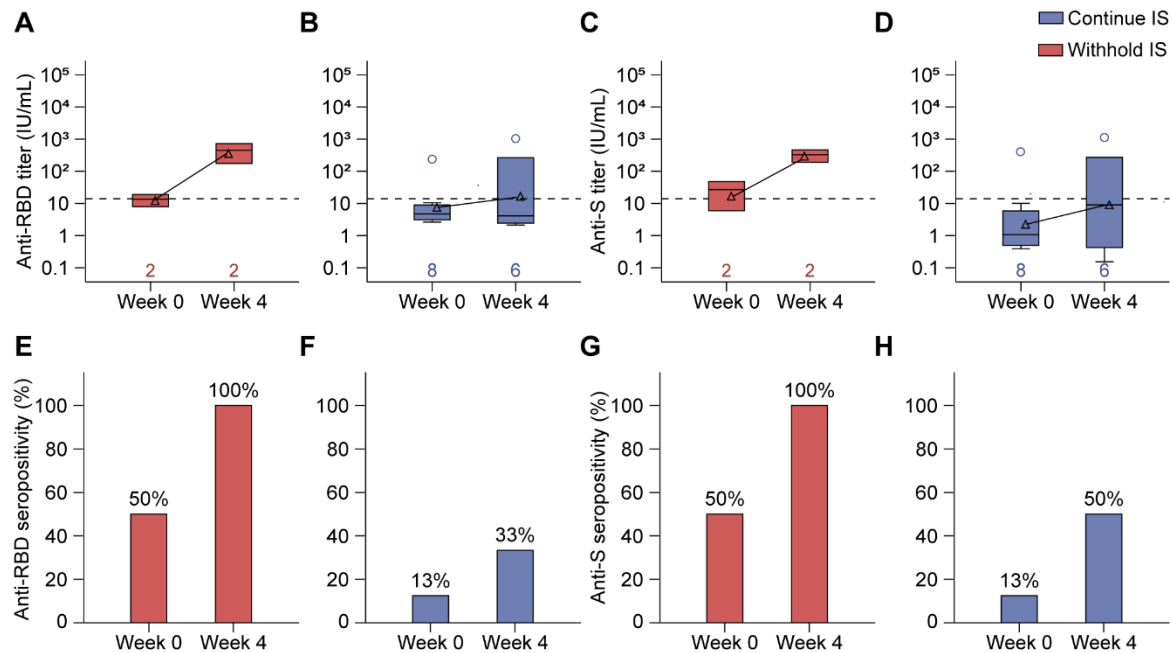

**Supplemental Figure 4. Humoral response in participants who received a second AD26.COVID.S vaccine.** (A-D) Concentration and (E-F) seropositivity of (A-B and E-F) anti-RBD and (C-D and G-H) anti-Spike (S) antibodies at weeks 0 and 4 post-second AD26.COVID.S vaccination in participants who withdrew (A, C, E, and G) mycophenolate mofetil/mycophenolic acid (MMF/MPA) or (B, D, F, and H) those taking B cell-depleting therapy (BCDT). Box plots display the interquartile range (IQR), with the line within the box indicating median values. Geometric mean values are represented by triangles and connected across study visits. Whiskers extend to 1.5\*IQR, with circles indicating outliers. The dashed line represents the positivity cut-off, and numbers indicate the number of participants analyzed at each time point.

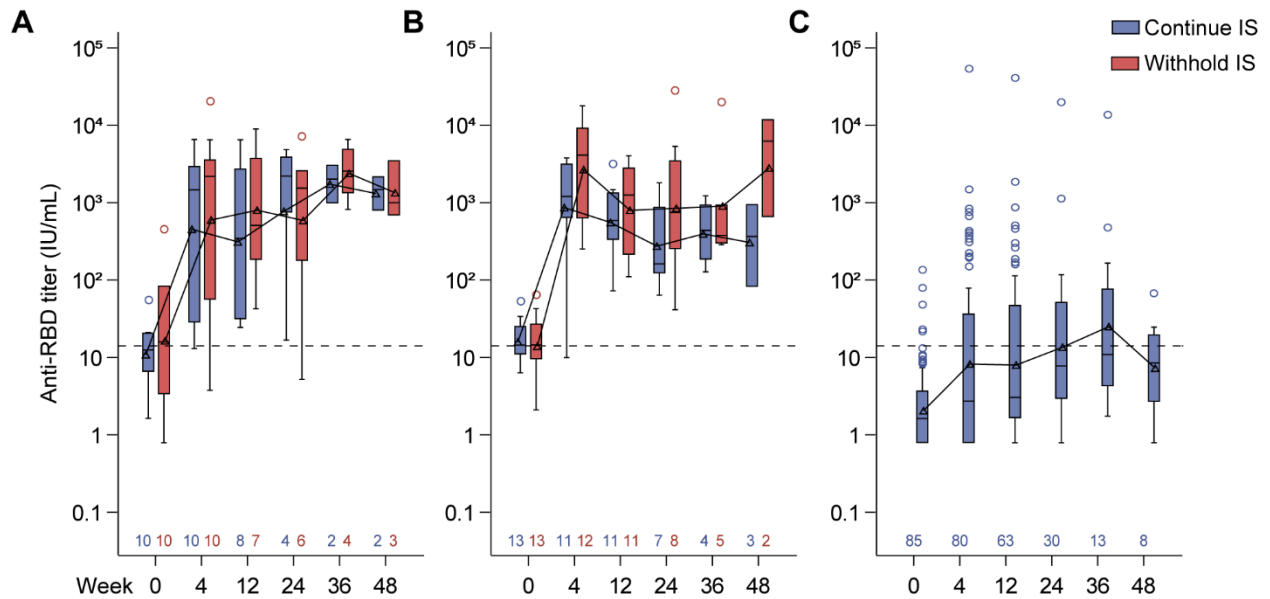

**Supplemental Figure 5. Longitudinal anti-RBD responses post-third mRNA vaccination in participants treated with mycophenolate mofetil/mycophenolic acid (MMF/MPA)-, methotrexate (MTX)-, and B cell-depleting therapy (BCDT).** Anti-RBD antibodies were measured at baseline and at 4, 12, 24, 36, and 48 weeks post-third vaccination in participants in the (A) MMF/MPA, (B) MTX, or (C) BCDT cohorts. Box plots display the interquartile range (IQR), with the line within the box indicating median values. Geometric mean values are represented by triangles and connected across study visits. Whiskers extend to 1.5\*IQR, with circles indicating outliers. The dashed line represents the positivity cut-off, and numbers indicate the number of participants analyzed at each time point; samples collected after a documented COVID-19 diagnosis, monoclonal antibody use, or a COVID-19 vaccination given off-study are excluded from the analyses. Some participants with low or sub-optimal responses rolled over to Stage 2 of the study prior to completing Stage 1.

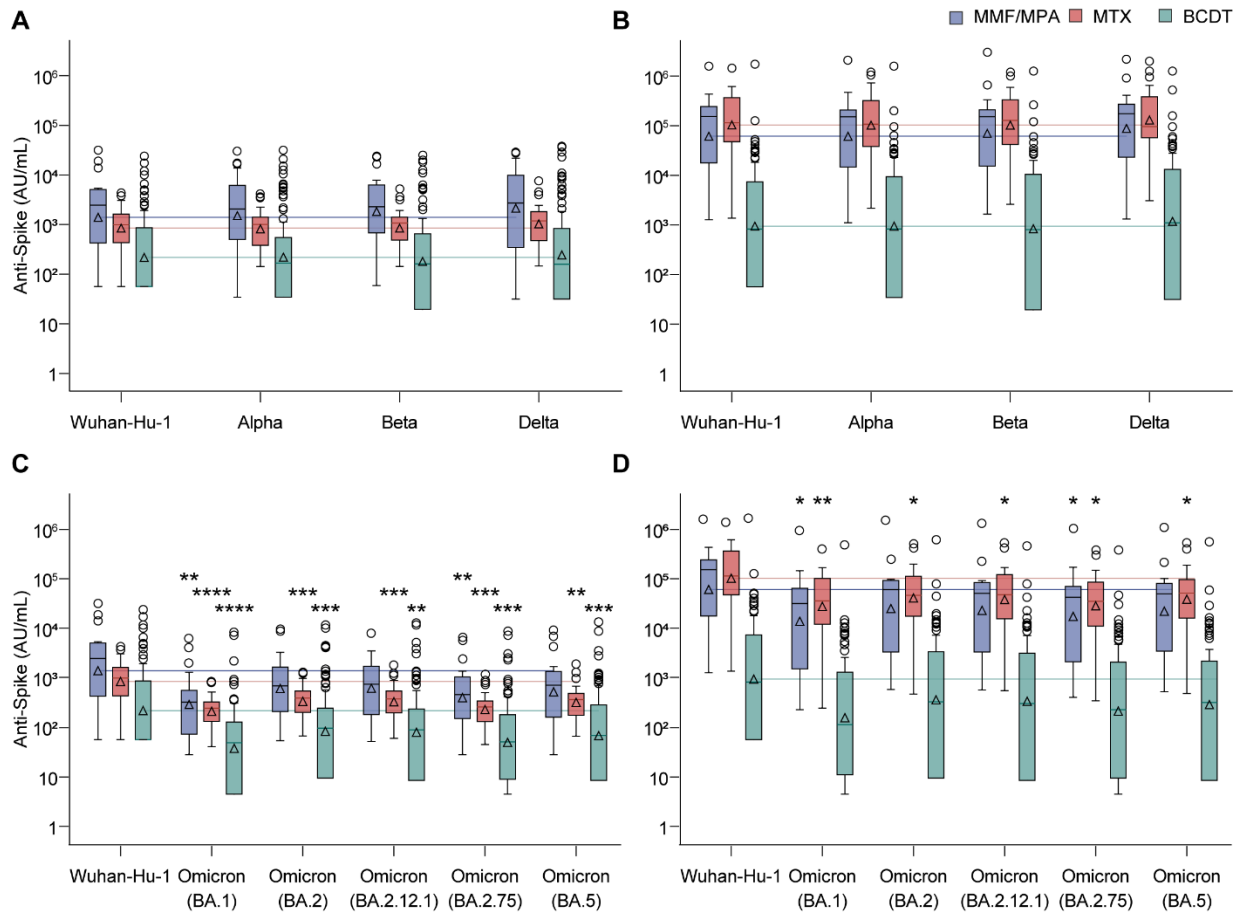

**Supplemental Figure 6. Anti-Spike (S) humoral responses across SARS-CoV-2 variants.** Antibody titers against the (A-B) Alpha, Beta, and Delta and (C-D) Omicron BA1, BA2, BA2.12.1, BA2.75, and BA5 S proteins relative to Wuhan-Hu-1 at (A and C) baseline and (B and D) week 4 post-third mRNA booster vaccination. Box plots display the interquartile range (IQR), with the line within the box indicating median values. Geometric mean values are represented by triangles. Whiskers extend to 1.5\*IQR, with circles indicating outliers. Horizontal lines indicate the geometric mean for the Wuhan-Hu-1 Spike variant by cohort for each visit. Statistical significance was determined using the stratified van Elteren test. \* $p < 0.05$ , \*\* $p < 0.01$  relative to the Wuhan-Hu-1 S protein for each cohort.

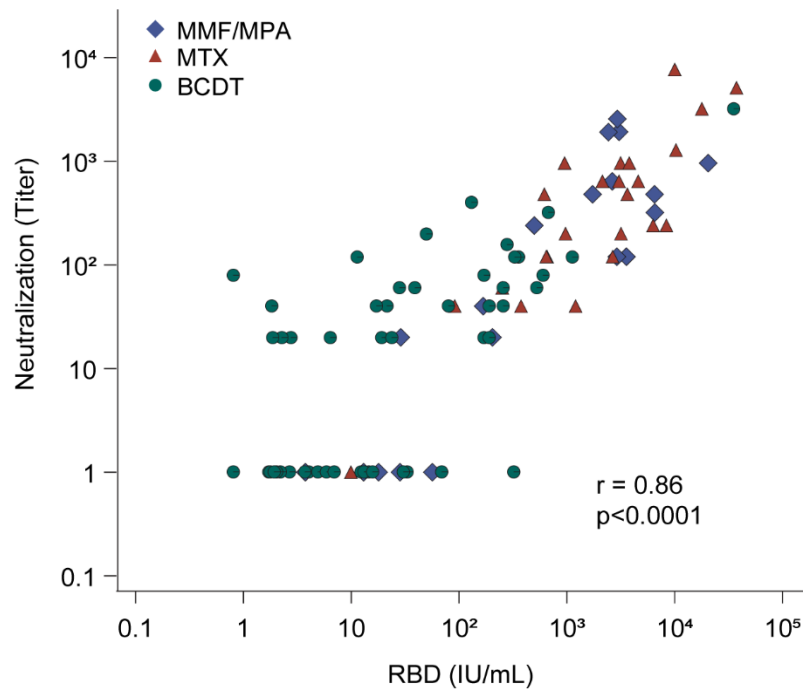

**Supplemental Figure 7. Correlation of week 4 anti-RBD and neutralization titers in participants who received a third mRNA vaccine.** Correlation between week 4 anti-RBD antibody titers and neutralization titers against the USA-WA1/2020 isolate. Correlation was assessed using Spearman's rank correlation coefficients.

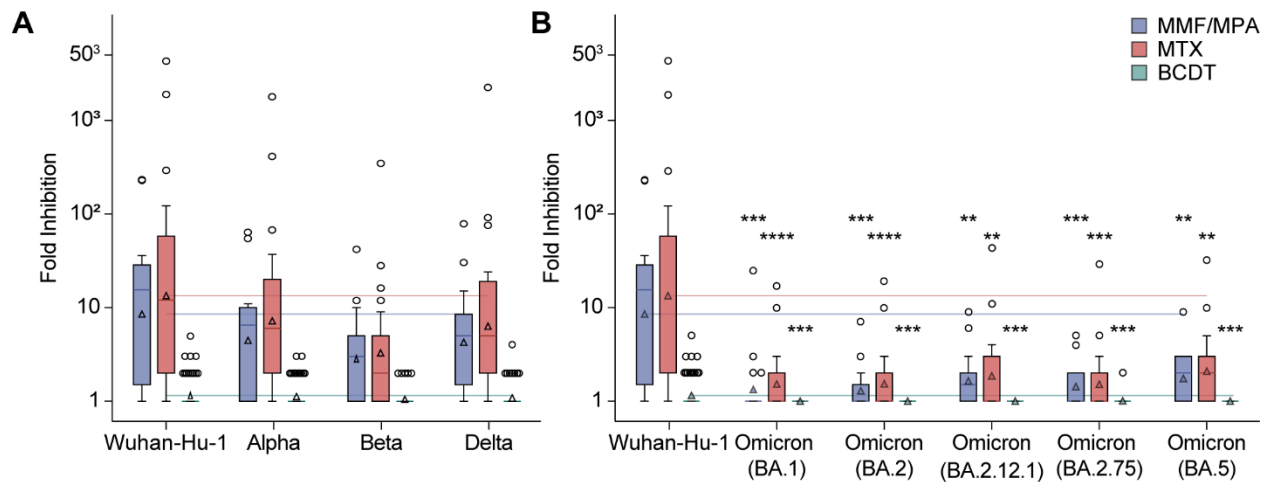

**Supplemental Figure 8. ACE2 neutralization across SARS-CoV-2 variants.** Fold inhibition of ACE2 binding against the (A) Alpha, Beta, and Delta and (B) Omicron BA.1, BA.2, BA.2.12.1, BA.2.75, and BA.5 SARS-CoV-2 variants relative to Wuhan-Hu-1 at week 4 post-third mRNA booster vaccination. Box plots display the interquartile range (IQR), with the line within the box indicating median values. Geometric mean values are represented by triangles and connected across study visits. Whiskers extend to 1.5\*IQR, with circles indicating outliers. Horizontal reference lines indicate the geometric mean for the Wuhan-Hu-1 variant by cohort for each visit. Statistical significance was determined using the stratified van Elteren test. \*\* $p < 0.01$ , \*\*\* $p < 0.001$ , \*\*\*\* $p < 0.0001$  relative to Wuhan-Hu-1 for each cohort.

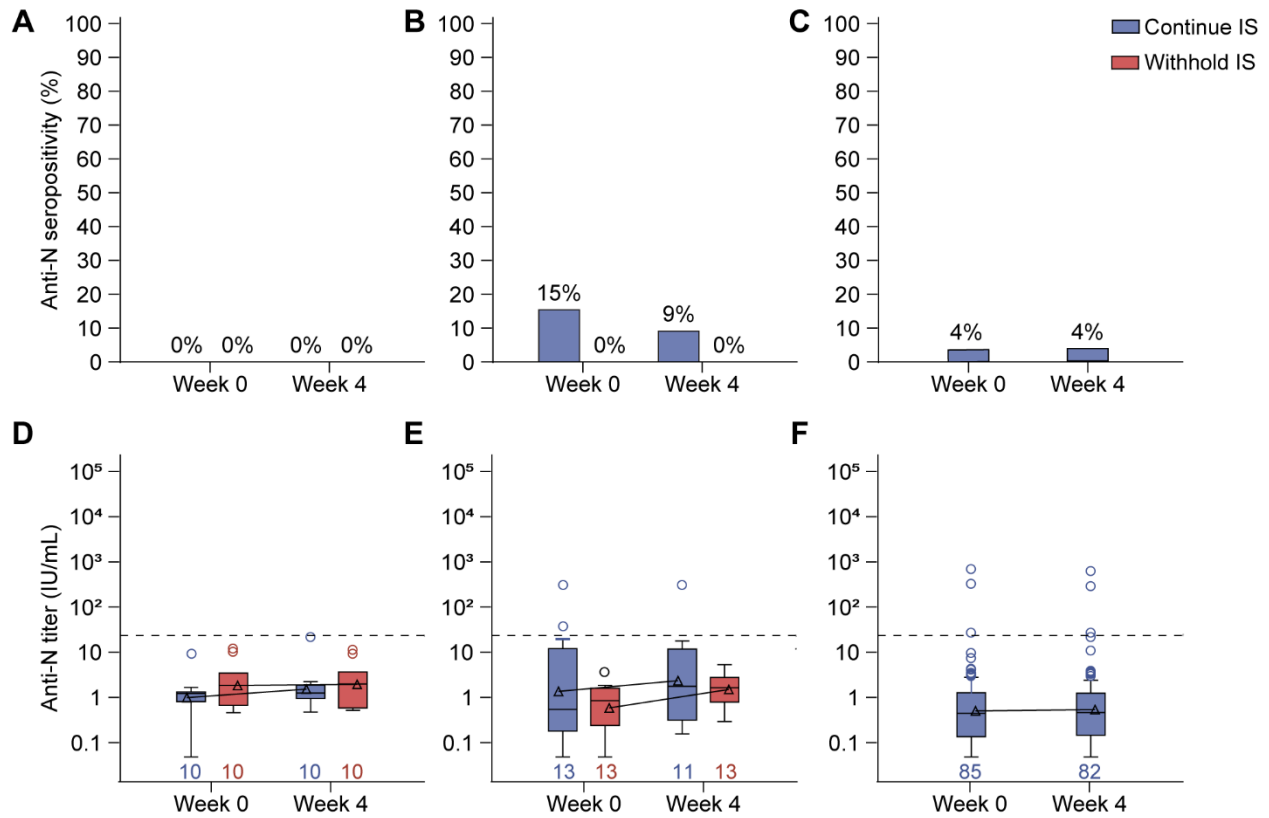

**Supplemental Figure 9. Anti-N-protein antibodies in participants who received a third mRNA vaccine.** Seropositivity of anti-N-protein antibodies at baseline and 4 weeks post-third mRNA vaccination in participants in the (A) mycophenolate mofetil/mycophenolic acid (MMF/MPA)-, (B) methotrexate (MTX)-, or (C) B cell-depleting therapy (BCDT) cohorts. Concentrations of anti-RBD antibodies at baseline and 4 weeks post-third mRNA vaccination in participants in the (D) MMF/MPA-, (E) MTX-, or (F) BCDT cohorts. Box plots display the interquartile range (IQR), with the line within the box indicating median values. Geometric mean values are represented by triangles and connected across study visits. Whiskers extend to 1.5\*IQR, with circles indicating outliers. The dashed line represents the positivity cut-off, and numbers indicate the number of participants analyzed at each time point.

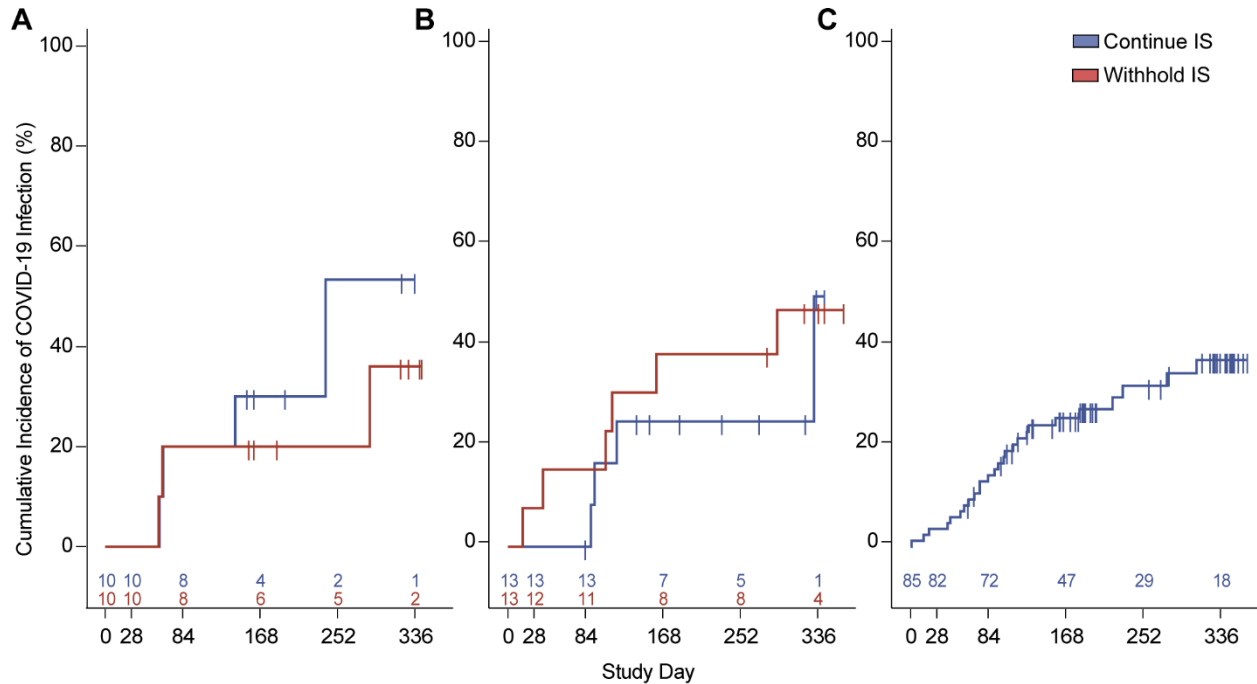

**Supplemental Figure 10. Cumulative incidence of COVID-19 in the vaccinated population that received a third mRNA vaccine.** Cumulative incidence of COVID-19 in participants within the (A) mycophenolate mofetil/mycophenolic acid (MMF/MPA)-, (B) methotrexate (MTX)-, or (C) B cell-depleting therapy (BCDT) cohorts throughout 48 weeks post-third vaccination. The cumulative incidence of COVID-19 was calculated using the Kaplan-Meier product limit estimator. Vertical lines indicate the timing of censored events.

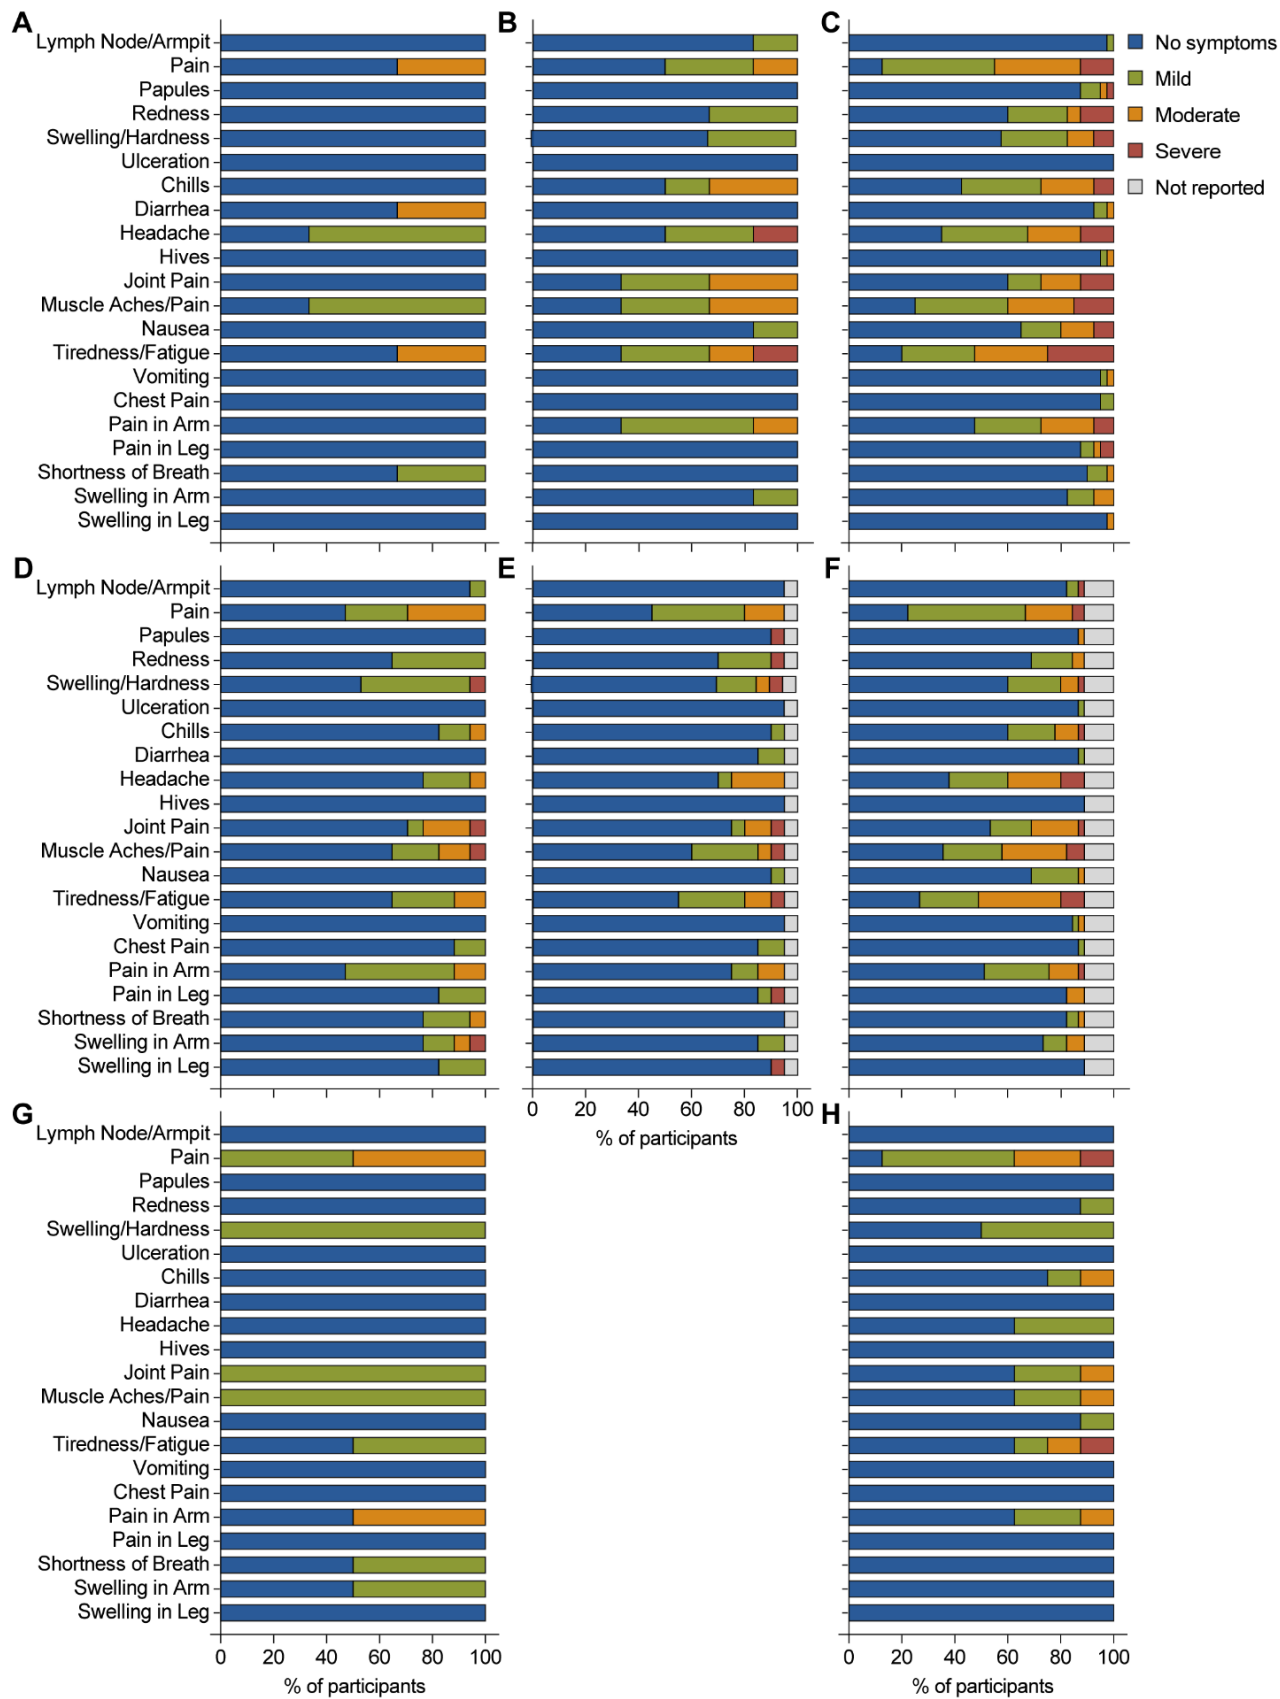

**Supplemental Figure 11. Solicited adverse events following additional vaccination.**

Maximum severity of solicited local and systemic reactions over 7 days post-additional (**A-C**) mRNA-1273, (**D-F**) BNT162b2, or (**G-H**) AD26.COV2.S vaccination in participants in the (**A, D,** and **G**) mycophenolate mofetil/mycophenolic acid (MMF/MPA)-, (**B** and **E**) methotrexate (MTX)-, or (**C, F,** and **H**) B cell-depleting therapy (BCDT) cohorts.

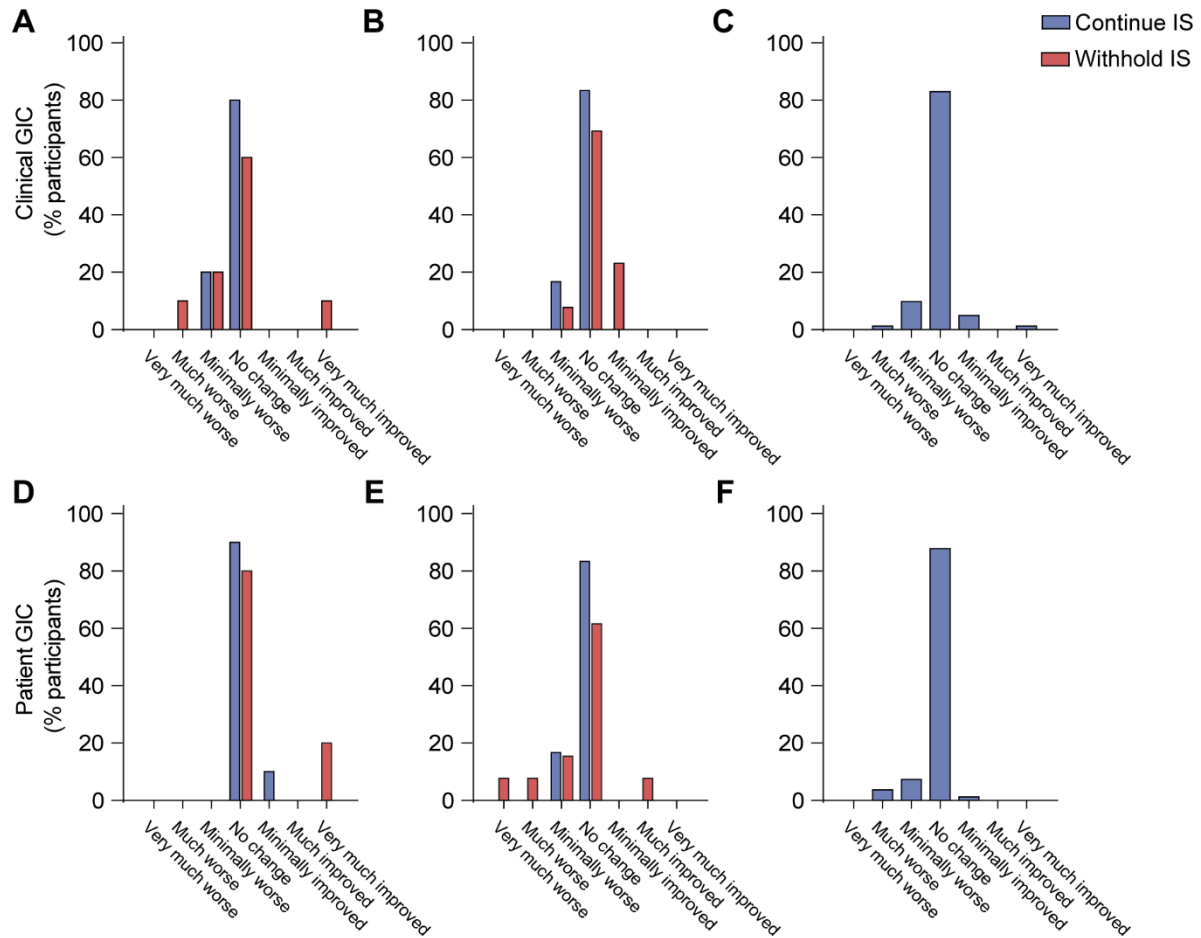

**Supplemental Figure 12. Changes in disease activity in the vaccinated population that received a third mRNA vaccine. (A-C) Clinical and (D-F) patient global impression of change (GIC) at week 4 post-third mRNA vaccine in participants in the (A and D) mycophenolate mofetil/mycophenolic acid-, (B and E) methotrexate-, or (C and F) B cell-depleting therapy-treated cohorts.**

**Supplemental Table 1.** Baseline demographics and characteristics by disease in the vaccinated population.

|                                                                        | <b>SLE</b><br>(n=27) | <b>RA</b><br>(n=38) | <b>MS</b><br>(n=67) | <b>SSc</b><br>(n=6) | <b>Pemphigus</b><br>(n=3) |
|------------------------------------------------------------------------|----------------------|---------------------|---------------------|---------------------|---------------------------|
| <b>Sex, n (%)</b>                                                      |                      |                     |                     |                     |                           |
| Female                                                                 | 24 (89)              | 36 (95)             | 44 (66)             | 6 (100)             | 1 (33)                    |
| Male                                                                   | 3 (11)               | 2 (5)               | 23 (34)             | 0                   | 2 (67)                    |
| <b>Race, n (%)</b>                                                     |                      |                     |                     |                     |                           |
| White                                                                  | 13 (48)              | 25 (66)             | 60 (90)             | 5 (83)              | 2 (67)                    |
| Black                                                                  | 13 (48)              | 6 (16)              | 6 (9)               | 1 (17)              | 1 (33)                    |
| Asian                                                                  | 0 (0)                | 3 (8)               | 0 (0)               | 0 (0)               | 0 (0)                     |
| Native Hawaiian or Other Pacific Islander                              | 0 (0)                | 0 (0)               | 0 (0)               | 0 (0)               | 0 (0)                     |
| American Indian or Alaska Native                                       | 0 (0)                | 1 (3)               | 0 (0)               | 0 (0)               | 0 (0)                     |
| Multiple                                                               | 0 (0)                | 2 (5)               | 0 (0)               | 0 (0)               | 0 (0)                     |
| Unknown                                                                | 1 (4)                | 1 (3)               | 1 (2)               | 0 (0)               | 0 (0)                     |
| <b>Ethnicity, n (%)</b>                                                |                      |                     |                     |                     |                           |
| Hispanic or Latino                                                     | 6 (22)               | 3 (8)               | 5 (8)               | 2 (33)              | 0 (0)                     |
| Not Hispanic or Latino                                                 | 21 (78)              | 35 (92)             | 62 (93)             | 4 (67)              | 3 (100)                   |
| <b>Age (years), mean (SD)</b>                                          | 49.1 (15.4)          | 63.0 (11.7)         | 45.8 (11.3)         | 55.8 (15.6)         | 69.7 (6.8)                |
| <b>Response to initial COVID-19 vaccination<sup>a</sup>, n (%)</b>     |                      |                     |                     |                     |                           |
| Negative                                                               | 9 (33)               | 17 (45)             | 48 (72)             | 3 (50)              | 2 (67)                    |
| Sub-optimal                                                            | 18 (67)              | 21 (55)             | 19 (28)             | 3 (50)              | 1 (33)                    |
| <b>Weeks since initial COVID-19 vaccination<sup>b</sup>, mean (SD)</b> | 23.1 (8.6)           | 25.2 (8.1)          | 25.5 (5.5)          | 29.8 (5.6)          | 31.1 (3.1)                |
| <b>Prior COVID-19 diagnosis, n (%)</b>                                 | 2 (7)                | 1 (3)               | 4 (6)               | 1 (17)              | 0 (0)                     |
| <b>Vaccine received, n (%)</b>                                         |                      |                     |                     |                     |                           |
| BNT162b2                                                               | 21 (78)              | 22 (58)             | 34 (51)             | 4 (67)              | 1 (33)                    |
| mRNA-1273                                                              | 4 (15)               | 16 (42)             | 26 (39)             | 1 (17)              | 2 (67)                    |
| AD26.COV2.S                                                            | 2 (7)                | 0 (0)               | 7 (10)              | 1 (17)              | 0 (0)                     |
| <b>MMF-treated, n</b>                                                  | 16                   | 1                   | 0                   | 3                   | 1                         |
| mg/day, mean (SD)                                                      | 2375<br>(806.2)      | 1000 (-)            | NA                  | 1833<br>(1040.8)    | 3000 (-)                  |
| <b>MPA-treated, n</b>                                                  | 2                    | 0                   | 0                   | 2                   | 0                         |
| mg/day, mean (SD)                                                      | 900.0<br>(763.7)     | NA                  | NA                  | 2160 (0.0)          | NA                        |
| <b>MTX-treated, n</b>                                                  | 6                    | 25                  | 0                   | 0                   | 0                         |
| mg/week, mean (SD)                                                     | 21.3 (3.5)           | 17.1 (5.6)          | NA                  | NA                  | NA                        |
| <b>Ocrelizumab-treated, n</b>                                          | 0                    | 0                   | 62                  | 0                   | 0                         |
| mg/6 months, mean (SD)                                                 | NA                   | NA                  | 585.5 (64.9)        | NA                  | NA                        |
| <b>Ofatumumab-treated, n</b>                                           | 0                    | 0                   | 3                   | 0                   | 0                         |
| mg/month, mean (SD)                                                    | NA                   | NA                  | 20.0 (0.0)          | NA                  | NA                        |
| <b>Rituximab-treated, n</b>                                            | 5                    | 18                  | 2                   | 1                   | 2                         |
| mg, mean (SD)                                                          | 1000 (0.0)           | 972.2<br>(117.9)    | 1000 (0.0)          | 1000 (-)            | 1000 (0.0)                |
| <b>Prednisone-treated, n</b>                                           | 14                   | 6                   | 0                   | 0                   | 1                         |
| Mg/day, mean (SD)                                                      | 6.0 (3.4)            | 4.1 (2.4)           | NA                  | NA                  | 5.0 (-)                   |
| <b>Physician's Global Assessment, mean (SD)</b>                        | 1.6 (1.8)            | 1.6 (1.5)           | 1.5 (2.6)           | 1.6 (1.0)           | 0.4 (0.6)                 |
| <b>Patient's Global Assessment, mean (SD)</b>                          | 4.4 (2.9)            | 4.2 (2.7)           | 3.2 (2.7)           | 4.9 (2.1)           | 3.5 (3.2)                 |
| <b>SLEDAI, mean (SD)</b>                                               | 3.3 (4.0)            | NA                  | NA                  | NA                  | NA                        |
| <b>DAS28-CRP, mean (SD)</b>                                            | NA                   | 2.9 (1.3)           | NA                  | NA                  | NA                        |
| <b>EDSS, mean (SD)</b>                                                 | NA                   | NA                  | 3.0 (2.0)           | NA                  | NA                        |
| <b>mRSS, mean (SD)</b>                                                 | NA                   | NA                  | NA                  | 6.2 (10.8)          | NA                        |
| <b>PDAI, mean (SD)</b>                                                 | NA                   | NA                  | NA                  | NA                  | 0.3 (0.6)                 |

<sup>a</sup>Negative defined as a Roche Elecsys® Anti-SARS-CoV-2 S result  $\leq 0.79$  U/mL and sub-optimal defined as a Roche Elecsys® Anti-SARS-CoV-2 S result  $>0.79$  and  $\leq 200$  U/mL following the initial COVID-19 vaccine regimen

<sup>b</sup>Defined as weeks since completed initial course of vaccine to informed consent

DAS28-CRP, Disease Activity Score-28 for Rheumatoid Arthritis with CRP; EDSS, Kurtzke Expanded Disability Status Scale; MMF, mycophenolate mofetil; MPA, mycophenolic acid; mRSS, modified Rodnan Skin Score; MS, multiple sclerosis; MTX, methotrexate; PDAI, Pemphigus Disease Area Index; RA, rheumatoid arthritis; SLE, systemic lupus erythematosus; SLEDAI, Systemic Lupus Erythematosus Disease Activity Index; SSc, systemic sclerosis

**Supplemental Table 2.** Week 4 SARS-CoV-2 antibody concentrations.

| GM (%CV)     | MMF/MPA            |                    | MTX                |                    | BCDT<br>(n=80) |
|--------------|--------------------|--------------------|--------------------|--------------------|----------------|
|              | Continue<br>(n=10) | Withhold<br>(n=10) | Continue<br>(n=11) | Withhold<br>(n=12) |                |
| <b>Spike</b> | 471.36 (555.85)    | 733.22 (2239.88)   | 654.50 (734.18)    | 1858.98 (267.17)   | 6.41 (6592.25) |
| <b>RBD</b>   | 453.25 (1552.26)   | 597.62 (5609.26)   | 863.31 (527.74)    | 2671.09 (269.09)   | 8.21 (1759.38) |
| <b>N</b>     | 1.52 (143.78)      | 1.95 (160.07)      | 2.35 (1485.52)     | 1.50 (114.23)      | 0.53 (531.11)  |

BCDT, B cell-depleting therapy; CV, coefficient of variation; GM, geometric mean; MMF/MPA, mycophenolate mofetil/mycophenolic acid; MTX, methotrexate.

Antibody concentrations (IU/mL) were measured using the V-PLEX SARS-CoV-2 384 Panel 1 IgG kit (Meso Scale Diagnostics, LCC., Rockville, USA).

**Supplemental Table 3.** Week 4 anti-spike concentrations across SARS-CoV-2 variants.

| GM (%CV)          | MMF/MPA            |                    | MTX                |                    | BCDT<br>(N=80)    |
|-------------------|--------------------|--------------------|--------------------|--------------------|-------------------|
|                   | Continue<br>(N=10) | Withhold<br>(N=10) | Continue<br>(N=11) | Withhold<br>(N=12) |                   |
| <b>Wuhan-Hu-1</b> | 46220.16 (471.71)  | 80806.30 (1623.73) | 63299.42 (504.55)  | 161512.40 (250.96) | 945.67 (3003.47)  |
| <b>Alpha</b>      | 44030.42 (427.44)  | 84666.58 (1395.38) | 69053.14 (535.72)  | 146217.12 (248.96) | 944.45 (4966.19)  |
| <b>Beta</b>       | 44480.72 (473.49)  | 109369.62 (939.36) | 74430.51 (490.76)  | 137451.45 (230.63) | 837.74 (7434.65)  |
| <b>Delta</b>      | 54489.89 (468.67)  | 141244.79 (680.69) | 85639.34 (487.14)  | 189333.21 (219.96) | 1179.20 (7824.45) |
| <b>Omicron</b>    |                    |                    |                    |                    |                   |
| BA.1              | 11820.34 (588.36)  | 16413.24 (3541.53) | 17294.15 (578.75)  | 43205.81 (272.32)  | 157.02 (5421.06)  |
| BA.2              | 17476.90 (559.49)  | 36210.49 (1504.57) | 28322.41 (611.52)  | 58319.44 (247.09)  | 360.15 (5849.50)  |
| BA.2.12.1         | 16423.80 (533.34)  | 32604.67 (1396.49) | 26127.24 (561.35)  | 53907.62 (248.79)  | 337.31 (6010.14)  |
| BA.2.75           | 12225.09 (582.81)  | 25007.18 (1631.15) | 18892.55 (577.65)  | 41449.28 (260.33)  | 213.45 (7757.85)  |
| BA.5              | 16577.41 (531.45)  | 29866.63 (1431.15) | 26307.20 (576.01)  | 55649.46 (254.49)  | 288.04 (6122.06)  |

BCDT, B cell-depleting therapy; CV, coefficient of variation; GM, geometric mean; MMF/MPA, mycophenolate mofetil/mycophenolic acid; MTX, methotrexate.

Antibody concentrations (AU/mL) were measured using the V-PLEX SARS-CoV-2 Key Variant Spike Panel 1 IgG kit (Meso Scale Diagnostics, LCC., Rockville, USA).

**Supplemental Table 4.** Week 4 neutralization across SARS-CoV-2 variants.

| GM(%CV)           | MMF/MPA            |                    | MTX                |                    | BCDT<br>(N=80) |
|-------------------|--------------------|--------------------|--------------------|--------------------|----------------|
|                   | Continue<br>(N=10) | Withhold<br>(N=10) | Continue<br>(N=11) | Withhold<br>(N=12) |                |
| <b>Wuhan-Hu-1</b> | 7.17(576.80)       | 10.12(481.10)      | 5.98(305.32)       | 28.04(5,497.08)    | 1.15(34.70)    |
| <b>Alpha</b>      | 3.92(253.56)       | 5.11(208.03)       | 3.59(154.71)       | 13.74(1,625.84)    | 1.12(28.52)    |
| <b>Beta</b>       | 2.69(170.54)       | 2.97(116.05)       | 2.32(108.70)       | 4.53(452.08)       | 1.04(17.01)    |
| <b>Delta</b>      | 4.24(263.20)       | 4.29(150.26)       | 3.22(168.55)       | 11.77(1,236.38)    | 1.08(25.02)    |
| <b>Omicron</b>    |                    |                    |                    |                    |                |
| BA.1              | 1.12(35.82)        | 1.58(133.41)       | 1.13(28.60)        | 2.00(123.76)       | 1.00(0.00)     |
| BA.2              | 1.20(40.49)        | 1.40(70.57)        | 1.13(28.60)        | 2.02(128.31)       | 1.00(0.00)     |
| BA.2.12.1         | 1.58(63.50)        | 1.71(81.53)        | 1.33(55.57)        | 2.53(169.27)       | 1.00(0.00)     |
| BA.2.75           | 1.41(52.11)        | 1.45(58.78)        | 1.13(28.60)        | 1.97(131.42)       | 1.01(7.76)     |
| BA.5              | 1.60(55.14)        | 1.91(80.45)        | 1.51(55.39)        | 2.80(145.40)       | 1.00(0.00)     |

BCDT, B cell-depleting therapy; CV, coefficient of variation; GM, geometric mean; MMF/MPA, mycophenolate mofetil/mycophenolic acid; MTX, methotrexate.

Neutralization (ACE2 fold inhibition) was measured using the V-PLEX ACE2 Neutralization kit (Meso Scale Diagnostics, LCC., Rockville, USA).

**Supplemental Table 5.** Baseline associations with week 4 anti-RBD response in the vaccinated population that received an mRNA vaccine.

|                                                  | MMF/MPA or MTX<br>(n=43) |                      | BCDT<br>(n=80) |                      |
|--------------------------------------------------|--------------------------|----------------------|----------------|----------------------|
|                                                  | GM (CV)                  | p-value <sup>#</sup> | GM (CV)        | p-value <sup>a</sup> |
| <b>Vaccine Type</b>                              |                          |                      |                |                      |
| mRNA-1273                                        | 1,510 (515.4)            | 0.46                 | 9 (943.1)      | 0.37                 |
| BNT162b2                                         | 824 (1,312.3)            |                      | 8 (3,104.6)    |                      |
| <b>Immunosuppressant treatment</b>               |                          | 0.12                 |                |                      |
| Withhold                                         | 1,352 (1,302.0)          |                      | NA             |                      |
| Continue                                         | 635 (835.4)              |                      | NA             |                      |
| <b>Sex</b>                                       |                          | 0.94                 |                | 0.8                  |
| Male                                             | 1,975 (45.1)             |                      | 7 (1,543.9)    |                      |
| Female                                           | 884 (1,247.1)            |                      | 9 (1,952.7)    |                      |
| <b>Age</b>                                       |                          | 0.61                 |                | 0.76                 |
| ≤ Median (51 years)                              | 1,253 (967.0)            |                      | 7 (1,861.2)    |                      |
| > Median (51 years)                              | 812 (1,178.3)            |                      | 10 (1,732.1)   |                      |
| <b>Disease Type</b>                              |                          | <b>0.026</b>         |                | 0.47                 |
| Systemic Lupus Erythematosus                     | 788 (2,068.6)            |                      | 4 (6,828.3)    |                      |
| Rheumatoid Arthritis                             | 2,483 (184.5)            |                      | 4 (683.2)      |                      |
| Multiple Sclerosis                               | -                        |                      | 10 (1,951.0)   |                      |
| Systemic Sclerosis                               | 73 (148.8)               |                      | 49 (-)         |                      |
| Pemphigus                                        | 57 (-)                   |                      | 21 (-)         |                      |
| <b>Weeks since original COVID-19 vaccination</b> |                          | 0.55                 |                | 0.44                 |
| ≤ Median (25.1 weeks)                            | 832 (829.5)              |                      | 7 (1,033.0)    |                      |
| > Median (25.1 weeks)                            | 1,017 (1,395.7)          |                      | 11 (3,320.5)   |                      |
| <b>Prior COVID-19</b>                            |                          | 0.24                 |                | 0.36                 |
| Yes                                              | 6,504                    |                      | 17 (1,851.5)   |                      |
| No                                               | 893 (1,079.0)            |                      | 8 (1,783.2)    |                      |
| <b>Prednisone use</b>                            |                          | 0.67                 |                | 0.77                 |
| Yes                                              | 1,585 (240.8)            |                      | 15 (12,149.3)  |                      |
| No                                               | 725 (2,025.7)            |                      | 8 (1,530.1)    |                      |
| <b>Medication</b>                                |                          | 0.17                 |                | 0.23                 |
| MMF/MPA                                          | 520 (2,494.9)            |                      | NA             |                      |
| MTX                                              | 1,556 (417.8)            |                      | NA             |                      |
| Rituximab                                        | NA                       |                      | 5 (1,289.3)    |                      |
| Ocrelizumab                                      | NA                       |                      | 10 (1,974.2)   |                      |
| Ofatumumab                                       | NA                       |                      | 23 (3,390.9)   |                      |
| <b>Baseline CD19 count</b>                       |                          |                      |                | <b>0.0014</b>        |
| Absent                                           | NA                       |                      | 4 (741.1)      |                      |
| Present                                          | NA                       |                      | 29 (3,204.9)   |                      |
| <b>Days since last BCDT dose</b>                 |                          |                      |                | 0.13                 |
| ≤ Median (127 days)                              | NA                       |                      | 5 (536.4)      |                      |
| > Median (127 days)                              | NA                       |                      | 14 (4,566.9)   |                      |
| <b>Years since Disease Diagnosis</b>             |                          | 1.0                  |                | 0.94                 |
| ≤ Median (8.1 years)                             | 1,047 (756.6)            |                      | 9 (2,231.4)    |                      |
| > Median (8.1 years)                             | 855 (1,532.5)            |                      | 8 (1,440.4)    |                      |

BCDT, B cell-depleting therapy; CV, coefficient of variation; GM, geometric mean; MMF/MPA, mycophenolate mofetil/mycophenolic acid; MTX, methotrexate

<sup>a</sup>Wilcoxon rank-sum test, bold text denotes statistical significance (p<0.05)

**Supplemental Table 6.** Incidence of adverse events (AEs) in participants who received a third mRNA vaccine.

|                          | MMF/MPA            |        |                    |        | MTX                |        |                    |        | BCDT               |         |
|--------------------------|--------------------|--------|--------------------|--------|--------------------|--------|--------------------|--------|--------------------|---------|
|                          | Continue           |        | Withhold           |        | Continue           |        | Withhold           |        | Subjects<br>(n=85) | Events  |
|                          | Subjects<br>(n=10) | Events | Subjects<br>(n=10) | Events | Subjects<br>(n=13) | Events | Subjects<br>(n=13) | Events |                    |         |
| <b>AEs</b>               | 4 (40)             | 6      | 4 (40)             | 5      | 5 (39)             | 7      | 6 (46)             | 6      | 39 (46)            | 55      |
| Grade 1                  | 4 (40)             | 5 (83) | 3 (30)             | 3 (60) | 1 (8)              | 1 (14) | 2 (15)             | 2 (33) | 19 (22)            | 20 (36) |
| Grade 2                  | 1 (10)             | 1 (17) | 1 (10)             | 2 (40) | 4 (31)             | 6 (86) | 3 (23)             | 3 (50) | 20 (24)            | 22 (40) |
| Grade 3                  | 0 (0)              | 0 (0)  | 0 (0)              | 0 (0)  | 0 (0)              | 0 (0)  | 1 (8)              | 1 (17) | 10 (12)            | 13 (24) |
| Grade 4                  | 0 (0)              | 0 (0)  | 0 (0)              | 0 (0)  | 0 (0)              | 0 (0)  | 0 (0)              | 0 (0)  | 0 (0)              | 0 (0)   |
| Grade 5                  | 0 (0)              | 0 (0)  | 0 (0)              | 0 (0)  | 0 (0)              | 0 (0)  | 0 (0)              | 0 (0)  | 0 (0)              | 0 (0)   |
| Related to Vaccine       | 0 (0)              | 0 (0)  | 0 (0)              | 0 (0)  | 0 (0)              | 0 (0)  | 0 (0)              | 0 (0)  | 6 (7)              | 6 (11)  |
| <b>SAEs</b>              | 0 (0)              | 0      | 0 (0)              | 0      | 0 (0)              | 0      | 1 (8)              | 1      | 9 (11)             | 11      |
| Related to Vaccine       | 0 (0)              | 0 (0)  | 0 (0)              | 0 (0)  | 0 (0)              | 0 (0)  | 0 (0)              | 0 (0)  | 1 (1)              | 1 (9)   |
| <b>MAAE<sup>a</sup></b>  | 0 (0)              | 0 (0)  | 0 (0)              | 0 (0)  | 0 (0)              | 0 (0)  | 0 (0)              | 0 (0)  | 1 (1)              | 1 (2)   |
| <b>NOCMC<sup>b</sup></b> | 0 (0)              | 0 (0)  | 0 (0)              | 0 (0)  | 0 (0)              | 0 (0)  | 0 (0)              | 0 (0)  | 7 (8)              | 7 (13)  |
| <b>AESI</b>              |                    |        |                    |        |                    |        |                    |        |                    |         |
| Myocarditis              | 0 (0)              | 0 (0)  | 0 (0)              | 0 (0)  | 0 (0)              | 0 (0)  | 0 (0)              | 0 (0)  | 0 (0)              | 0 (0)   |
| Pericarditis             | 0 (0)              | 0 (0)  | 0 (0)              | 0 (0)  | 0 (0)              | 0 (0)  | 0 (0)              | 0 (0)  | 0 (0)              | 0 (0)   |

Values depict n (%)

Percentages for the number of participants with events are based on the number of participants in the vaccinated population.

AE, adverse event; AESI, adverse events of special interest; MAAE, medically attended adverse event; NOCMC, new-onset chronic medical condition; SAE, serious adverse event

<sup>a</sup>MAAE defined as a hospitalization, emergency room visit, or unscheduled medical visit for any reason and considered related to the vaccine. <sup>b</sup>NOCMC is defined as any new ICD diagnosis during the study after receipt of the vaccine that will continue for at least 3 months and requires continued health care intervention.

**Supplemental Table 7.** Incidence of adverse events (AEs) in participants who received a second AD26.COVS vaccine.

|                          | <b>MMF/MPA<br/>Withhold</b> |         | <b>BCDT</b>       |        |
|--------------------------|-----------------------------|---------|-------------------|--------|
|                          | Subjects<br>(n=2)           | Events  | Subjects<br>(n=8) | Events |
| <b>AEs</b>               | 1 (50)                      | 1       | 6 (75)            | 6      |
| Grade 1                  | 0 (0)                       | 0 (0)   | 4 (50)            | 4 (67) |
| Grade 2                  | 0 (0)                       | 0 (0)   | 2 (25)            | 2 (33) |
| Grade 3                  | 1 (100)                     | 1 (100) | 0 (0)             | 0 (0)  |
| Grade 4                  | 0 (0)                       | 0 (0)   | 0 (0)             | 0 (0)  |
| Grade 5                  | 0 (0)                       | 0 (0)   | 0 (0)             | 0 (0)  |
| Related to Vaccine       | 0 (0)                       | 0 (0)   | 0 (0)             | 0 (0)  |
| <b>SAEs</b>              | 1 (50)                      | 1       | 0 (0)             | 0      |
| Related to Vaccine       | 0 (0)                       | 0 (0)   | 0 (0)             | 0 (0)  |
| <b>MAAE<sup>a</sup></b>  | 0 (0)                       | 0 (0)   | 0 (0)             | 0 (0)  |
| <b>NOCMC<sup>b</sup></b> | 0 (0)                       | 0 (0)   | 0 (0)             | 0 (0)  |
| <b>AESI</b>              |                             |         |                   |        |
| Myocarditis              | 0 (0)                       | 0 (0)   | 0 (0)             | 0 (0)  |
| Pericarditis             | 0 (0)                       | 0 (0)   | 0 (0)             | 0 (0)  |

Values depict n (%)

Percentages for the number of participants with events are based on the number of participants in the vaccinated population.

AE, adverse event; AESI, adverse events of special interest; MAAE, medically attended adverse event; NOCMC, new-onset chronic medical condition; SAE, serious adverse event; VAE, vaccine-related adverse event

<sup>a</sup>MAAE defined as a hospitalization, emergency room visit, or unscheduled medical visit for any reason and considered related to the vaccine.

<sup>b</sup>NOCMC is defined as any new ICD diagnosis during the study after receipt of the vaccine that will continue for at least 3 months and requires continued health care intervention.

**Supplemental Table 8.** Disease flares at 4 weeks post-booster vaccination in participants who received a third mRNA vaccine.

|                                   | MMF/MPA  |          | MTX      |          | BCDT   | All    |
|-----------------------------------|----------|----------|----------|----------|--------|--------|
|                                   | Continue | Withhold | Continue | Withhold |        |        |
| <b>SLE participants, n</b>        | 7        | 8        | 3        | 3        | 4      | 25     |
| Severe flare <sup>a</sup> , n (%) | 0 (0)    | 0 (0)    | 0 (0)    | 0 (0)    | 0 (0)  | 0 (0)  |
| Mild/moderate flare, n (%)        | 3 (43)   | 1 (13)   | 1 (33)   | 0 (0)    | 0 (0)  | 5 (20) |
| <b>RA participants, n</b>         | 0        | 0        | 9        | 10       | 17     | 36     |
| Flare <sup>b</sup> , n (%)        | NA       | NA       | 0 (0)    | 0 (0)    | 2 (12) | 2 (6)  |
| <b>MS participants, n</b>         | 0        | 0        | 0        | 0        | 60     | 60     |
| Relapse <sup>c</sup> , n (%)      | NA       | NA       | NA       | NA       | 0 (0)  | 0 (0)  |
| <b>SSc participants, n</b>        | 3        | 1        | 0        | 0        | 1      | 5      |
| Severe flare <sup>d</sup> , n (%) | 0 (0)    | 0 (0)    | NA       | NA       | 0 (0)  | 0 (0)  |
| <b>Pemphigus participants, n</b>  | 0        | 1        | 0        | 0        | 2      | 3      |
| Severe flare <sup>e</sup> , n (%) | NA       | 1 (100)  | NA       | NA       | 0 (0)  | 1 (33) |

BCDT, B cell-depleting therapy; MMF/MPA, mycophenolate mofetil/mycophenolic acid; MTX, methotrexate; MS, multiple sclerosis; RA, rheumatoid arthritis; SSc, systemic sclerosis; SLE, systemic lupus erythematosus  
Disease activity measured by <sup>a</sup>Thanou modified SELENA-SLEDAI Flare Index; <sup>b</sup>increase in DAS-28 score >1.2 or >0.6 if the Week 4 DAS-28 score is >3.2; <sup>c</sup>Physician-assessed relapse for MS; <sup>d</sup>onset of new or significant worsening of internal organ involvement requiring hospitalization or change in treatment or worsening of skin thickening on the modified Rodnan Skin Score of >4 units; <sup>e</sup>At least 3 new lesions a month that do not heal spontaneously within 1 week or by the extension of established lesions in a participant who has achieved disease control

**Supplemental Table 9.** Participating study centers

| <b>Site Name</b>                                                 | <b>Site PI</b>              | <b>Screened</b> | <b>Randomized/<br/>Allocated</b> |
|------------------------------------------------------------------|-----------------------------|-----------------|----------------------------------|
| Benaroya Research Institute                                      | Sandra Lord, MD             | 4               | 4                                |
| Brigham and Women's Hospital                                     | Jeffrey A. Sparks, MD, MMSc | 12              | 8                                |
| Cleveland Clinic                                                 | Jeffrey Cohen, MD           | 19              | 11                               |
| Columbia University                                              | Anca Askanase, MD           | 10              | 0                                |
| Duke University Medical Center                                   | Ankoor Shah, MD             | 1               | 0                                |
| Emory University                                                 | Arezou Khosroshahi, MD      | 42              | 10                               |
| Feinstein Institute for Medical Research                         | Meggan Mackay, MD           | 42              | 34                               |
| Massachusetts General Hospital – Division of Rheumatology        | Zachary Wallace, MD         | 18              | 11                               |
| Michigan Medicine                                                | Dinesh Khanna, MD           | 29              | 19                               |
| Medical University of South Carolina                             | Diane L. Kamen, MD          | 9               | 1                                |
| New York University Langone Orthopedic Center                    | Amit Saxena, MD             | 10              | 4                                |
| Oklahoma Medical Research Foundation                             | Judith James, MD, PhD       | 47              | 25                               |
| Temple University, Lewis Katz SOM                                | Roberto Caricchio, MD       | 5               | 4                                |
| University of California, Los Angeles Division of Rheumatology   | Maureen McMahon, MD         | 0               | 0                                |
| University of Pennsylvania Perelman Center for Advanced Medicine | Amit Bar-Or, MD             | 26              | 14                               |
| University of Rochester Medical Center                           | Christopher Palma, MD, ScM  | 0               | 0                                |
| University of Texas Health Science Center at Houston             | Maureen D. Mayes, MD        | 0               | 0                                |
| Washington University School of Medicine                         | Alfred Kim, MD, PhD         | 3               | 2                                |
| Yale University School of Medicine                               | Fotios Koumpouras, MD       | 2               | 1                                |

## Supplemental Acknowledgements

| <b>ACV01 Study Team</b> | <b>Institution</b>                        |
|-------------------------|-------------------------------------------|
| Alise Carlson, MD       | Cleveland Clinic                          |
| Deja Rose, MD           | Cleveland Clinic                          |
| Lindsay Ross, MD        | Cleveland Clinic                          |
| Sarah Simmons, MD       | Cleveland Clinic                          |
| Ahmad Mahadeen, MD      | Cleveland Clinic                          |
| Megan Elder, RN BSN     | Cleveland Clinic                          |
| Leah Tardivo, RN BSN    | Cleveland Clinic                          |
| Bryan Davies, RN        | Cleveland Clinic                          |
| Diane Ivancic           | Cleveland Clinic                          |
| Stephanie Moore         | Cleveland Clinic                          |
| Sadie Coates            | Cleveland Clinic                          |
| Michelle Maxson         | Cleveland Clinic                          |
| Rachael Yim             | Cleveland Clinic                          |
| Jenna Titus             | Cleveland Clinic                          |
| Ariel S. Bizon          | Cleveland Clinic                          |
| Alecia Chase, RN BSN    | Cleveland Clinic                          |
| Moein Amin, MD          | Cleveland Clinic                          |
| Lisa Stropp, MD         | Cleveland Clinic                          |
| Jameson Holloman, MD    | Cleveland Clinic                          |
| Megan Roser             | Cleveland Clinic                          |
| Jacqueline Dinishak     | Cleveland Clinic                          |
| Amanda Evans            | Cleveland Clinic                          |
| Thomai Skaramagas       | Cleveland Clinic                          |
| Cristina Arriens, MD    | Oklahoma Medical Research Foundation      |
| Teresa Aberle, PA-C     | Oklahoma Medical Research Foundation      |
| Kelli Kraus             | Oklahoma Medical Research Foundation      |
| Micki Drake             | Oklahoma Medical Research Foundation      |
| Jason L. Larabee        | University of Oklahoma Health Sciences    |
| Patricia Gonzales, LVN  | University of Texas Health Science Center |
| Julio Charles, MS       | University of Texas Health Science Center |
| Asaff Harel, MD         | Northwell Health                          |
| Erik Anderson, MD, PhD  | Northwell Health                          |
| Cynthia Aranow, MD      | Northwell Health                          |
| Janine Sullivan, NP     | NYU Langone Health                        |
| Monica Gamez-Perez, RN  | NYU Langone Health                        |
| Emilie Schurenberg      | NYU Langone Health                        |
| Abraham Sinay-Smith     | NYU Langone Health                        |
